# Supplementary material
Source: publisher site journal article supplement (https://www.dovepress.com/get_supplementary_file.php?f=294149.docx)
Supplement: Supplementary file 1 [file get_supplementary_file.php]

**Additional file 1**

**Table S1:** Primers used in this study.

| Primer | Sequence (5' to 3') | Amplicon size (bp) |
| --- | --- | --- |
| PCR of 16S rRNA | | |
| 8f | CACGGATCCAGACTTTGATYMTGGCTCAG | 1498 |
| 1512r | GTGAAGCTTACGGYTAGCTTGTTACGACTT |  |
| Sequencing of 16S rRNA | | |
| 8f | CACGGATCCAGACTTTGATYMTGGCTCAG |  |
| 1512r | GTGAAGCTTACGGYTAGCTTGTTACGACTT |  |
| 534r | ATTACCGCGGCTGCTGG |  |
| 534f | CCAGCAGCCGCGGTAAT |  |
| PCR, cloning and sequencing of resistance determining regions for *E. anophelis* | | |
| *blaCME*-f | CGCGGATCCATGAAAAGAATTAGTATTATTTTTC | 912 |
| *blaCME*-r | CCGCTCGAGTTAGGGTTTATTTTTTTTATTTAAAG |  |
| *blaBlaB*-f | CGCGGATCCATGAAGAATATAATGCGGGCAC | 759 |
| *blaBlaB*-r | CCGCTCGAGTTAATTTGAAGCCTTTTGTTTTTG |  |
| *blaGOB*-f | CGCGGATCCATGAGAAATTTTGTTATACTGTTTTTCATG | 885 |
| *blaGOB*-r | CCGCTCGAGTTATTTATCTTGGGAATC |  |
| *RND*-f | CGCGGATCCATGAAACTGAAACAAACCATAATC | 1269 |
| *RND*-r | CCGCTCGAGTTAATGTTCATGCTCACCAAC |  |
| *ABC*-f | CCGGAATTCATGAAAACACAAAACTTAG | 1152 |
| *ABC*-r | CCGCTCGAGTTATTTAATAAAGAAACGAC |  |
| *MATE*-f | CGCGGATCCATGAATCAGCAAAAGTCTATTATATTG | 1365 |
| *MATE*-r | CCGCTCGAGTCAGGCTACTCTTAAATTCATTTTC |  |
| *SMR*-f | CGCGGATCCATGAACTGGATCATCTTAG | 339 |
| *SMR*-r | CCGCTCGAGTTAGTGAGATACAGCCTTTAATC |  |
| *MFS*-f | CGCGGATCCGTGGGTTTACTCCGTATTTATG | 1245 |
| *MFS*-r | CCGCTCGAGTTAATGTGCTGCTTTAACCTTAC |  |
| *blaKPC*-f | CATTCAAGGGCTTTCTTGCTGC | 488 |
| *blaKPC*-r | ACGACGGCATAGTCATTTGC |  |
| *blaIMP*-f | CATGGTTTGGTTGTTCTTGT | 488 |
| *blaIMP*-r | ATAATTTAGCGGACTTTGGC |  |
| *blaVIM*-f | TTATGGAGCAGCAACGATGT | 920 |
| *blaVIM*-r | CAAAAGTCCCGCTCCAACGA |  |
| *blaNDM*-r | CGGAATGGCTCATCACGATC | 621 |
| *blaNDM*-f | GGTTTGGCGATCTGGTTTTC |  |
| *blaOXA-48*-f | TTGGTGGCATCGATTATCGG | 438 |
| *blaOXA-48*-r | GAGCACTTCTTTTGTGATGGC |  |
| *blaTEM*-f | GTGCGCGGAACCCCTATT | 919 |
| *blaTEM*-r | TTACCAATGCTTAATCAGTGAGGC |  |
| *blaSHV*-f | CTTTACTCGCCTTTATCGGC | 1031 |
| *blaSHV*-r | TTACCGACCGGCATCTTTCC |  |
| *blaCTX-M-15-like*-f | TTAGGAAGTGTGCCGCTGCA | 700 |
| *blaCTX-M-15*-*like*-r | CGATATCGTTGGTGGTRCCAT |  |
| *blaCTX-M-1*-f | AAGACTGGGTGTGGCATTGA | 670 |
| *blaCTX-M-1*-r | AGGCTGGGTGAAGTAAGTGA |  |
| *blaCTX-M-9*-f | GCTTTATGCGCAGACGAGTG | 686 |
| *blaCTX-M-9*-r | GCCAGATCACCGCAATATCA |  |

Abbreviations: PCR, polymerase chain reaction; rRNA, ribosomal RNA.
